# Supplementary material
Source: PubMed Central journal article supplement (PMC4076125)
Supplement: 10.3163.1536-5050.102.3.006.sg001.pdf [file 10.3163.1536-5050.102.3.006.sg001.pdf]

## Information-seeking behavior and the use of online resources: a snapshot of current health sciences faculty

Sandra L. De Groote, MLIS, AHIP; Mary Shultz, MS; Deborah D. Bleicic, MLS, AHIP

### APPENDIX

#### Faculty database and journal use in the health sciences

Thank you for taking the time to participate in our survey.

#### 1. Database use

In the following section, we would like to know more about how you access and use databases.

1. How often do you search the following databases to find articles for research purposes?

|                                                  | Daily                 | Weekly                | Monthly               | Couple times<br>a year | Never                 |
|--------------------------------------------------|-----------------------|-----------------------|-----------------------|------------------------|-----------------------|
| Biological Abstracts                             | <input type="radio"/> | <input type="radio"/> | <input type="radio"/> | <input type="radio"/>  | <input type="radio"/> |
| CINAHL                                           | <input type="radio"/> | <input type="radio"/> | <input type="radio"/> | <input type="radio"/>  | <input type="radio"/> |
| Cochrane                                         | <input type="radio"/> | <input type="radio"/> | <input type="radio"/> | <input type="radio"/>  | <input type="radio"/> |
| Current Contents                                 | <input type="radio"/> | <input type="radio"/> | <input type="radio"/> | <input type="radio"/>  | <input type="radio"/> |
| EMBASE                                           | <input type="radio"/> | <input type="radio"/> | <input type="radio"/> | <input type="radio"/>  | <input type="radio"/> |
| Google Scholar                                   | <input type="radio"/> | <input type="radio"/> | <input type="radio"/> | <input type="radio"/>  | <input type="radio"/> |
| Google                                           | <input type="radio"/> | <input type="radio"/> | <input type="radio"/> | <input type="radio"/>  | <input type="radio"/> |
| International<br>Pharmaceutical Abstracts        | <input type="radio"/> | <input type="radio"/> | <input type="radio"/> | <input type="radio"/>  | <input type="radio"/> |
| MEDLINE: PubMed or<br>Ovid                       | <input type="radio"/> | <input type="radio"/> | <input type="radio"/> | <input type="radio"/>  | <input type="radio"/> |
| PsycINFO                                         | <input type="radio"/> | <input type="radio"/> | <input type="radio"/> | <input type="radio"/>  | <input type="radio"/> |
| SciFinder Scholar                                | <input type="radio"/> | <input type="radio"/> | <input type="radio"/> | <input type="radio"/>  | <input type="radio"/> |
| Web of Science (Science<br>Citation Index)       | <input type="radio"/> | <input type="radio"/> | <input type="radio"/> | <input type="radio"/>  | <input type="radio"/> |
| Other frequently used databases (please specify) |                       |                       |                       |                        |                       |

2. With which database do you start with to find articles for research purposes? Why?

- CINAHL
- Cochrane
- Current Contents
- EMBASE
- Google Scholar
- Google
- MEDLINE (Pubmed or Ovid)
- PsycINFO

- o Web of Science (Science Citation Index)
- o Other (please specify below)
- o Please explain why you begin with this database.

3. How often do you search the following databases for clinical and patient care information?

|                                                  | Daily                 | Weekly                | Monthly               | Couple times<br>a year | Never                 |
|--------------------------------------------------|-----------------------|-----------------------|-----------------------|------------------------|-----------------------|
| Access Medicine                                  | <input type="radio"/> | <input type="radio"/> | <input type="radio"/> | <input type="radio"/>  | <input type="radio"/> |
| Access Pharmacy                                  | <input type="radio"/> | <input type="radio"/> | <input type="radio"/> | <input type="radio"/>  | <input type="radio"/> |
| Clinical Evidence                                | <input type="radio"/> | <input type="radio"/> | <input type="radio"/> | <input type="radio"/>  | <input type="radio"/> |
| Clinical Pharmacology                            | <input type="radio"/> | <input type="radio"/> | <input type="radio"/> | <input type="radio"/>  | <input type="radio"/> |
| Cochrane                                         | <input type="radio"/> | <input type="radio"/> | <input type="radio"/> | <input type="radio"/>  | <input type="radio"/> |
| DynaMed                                          | <input type="radio"/> | <input type="radio"/> | <input type="radio"/> | <input type="radio"/>  | <input type="radio"/> |
| Essential Evidence Plus                          | <input type="radio"/> | <input type="radio"/> | <input type="radio"/> | <input type="radio"/>  | <input type="radio"/> |
| First Consult                                    | <input type="radio"/> | <input type="radio"/> | <input type="radio"/> | <input type="radio"/>  | <input type="radio"/> |
| JBI Connect                                      | <input type="radio"/> | <input type="radio"/> | <input type="radio"/> | <input type="radio"/>  | <input type="radio"/> |
| MD Consult                                       | <input type="radio"/> | <input type="radio"/> | <input type="radio"/> | <input type="radio"/>  | <input type="radio"/> |
| Nursing Reference Center                         | <input type="radio"/> | <input type="radio"/> | <input type="radio"/> | <input type="radio"/>  | <input type="radio"/> |
| ACP Pier                                         | <input type="radio"/> | <input type="radio"/> | <input type="radio"/> | <input type="radio"/>  | <input type="radio"/> |
| UpToDate                                         | <input type="radio"/> | <input type="radio"/> | <input type="radio"/> | <input type="radio"/>  | <input type="radio"/> |
| Other frequently used databases (please specify) |                       |                       |                       |                        |                       |

4. What are the primary information needs that prompt you to search online resources (e.g., CINAHL, EMBASE, Google Scholar, MEDLINE, Web of Science) to find articles? *Check all that apply.*

- o Research/Background literature search
- o Patient care information
- o Instructional preparation
- o Keeping current in my field
- o Other (please specify)

5. From where do you generally access University of Illinois–Chicago (UIC) Library online resources and databases?

- o UIC Library web page (A to Z list)
- o Health Sciences Gateway
- o Library Research Subject Guide (e.g., nursing subject guide, pharmacy subject guide, dentistry subject guide, medicine subject guide)
- o My own bookmarks in my Internet web browser
- o My own personalized home page (iGoogle, MyYahoo, Yahoo Bookmarks)

- o Use a search engine (Google, Yahoo) to find the database
- o Your departmental web pages
- o Other (please specify)

6. What would help you to better utilize the library resources?

## 2. Journal use

In the following section, we would like to know more about how you access and use journals.

7. How would you describe your current level of access to research articles?

- o Excellent (I have access to all the journal articles I need)
- o Good (I have access to most of the journal articles I need)
- o Varies (I sometimes have difficulty getting the journal articles I need)
- o Poor (I frequently have difficulty getting the journal articles I need)
- o Very poor (I always have great difficulty getting the journal articles I need)

8. How do you find articles for your research and/or keep up to date on the literature in your field?

|                                                                                                                                                 | Often use             | Sometimes use         | Never use             |
|-------------------------------------------------------------------------------------------------------------------------------------------------|-----------------------|-----------------------|-----------------------|
| Search databases for articles on a topic                                                                                                        | <input type="radio"/> | <input type="radio"/> | <input type="radio"/> |
| Read print table of contents or browse print journals                                                                                           | <input type="radio"/> | <input type="radio"/> | <input type="radio"/> |
| Read online table of contents or browse online journals                                                                                         | <input type="radio"/> | <input type="radio"/> | <input type="radio"/> |
| Have table of contents emailed to personal email account (email alert)                                                                          | <input type="radio"/> | <input type="radio"/> | <input type="radio"/> |
| Have citation information of articles on a topic emailed to a personal email account (email alert from a database using a predetermined search) | <input type="radio"/> | <input type="radio"/> | <input type="radio"/> |
| Create an RSS feed for the table of contents of a journal                                                                                       | <input type="radio"/> | <input type="radio"/> | <input type="radio"/> |
| Create an RSS feed for articles on a topic (predetermined search in a database)                                                                 | <input type="radio"/> | <input type="radio"/> | <input type="radio"/> |
| Through Twitter updates                                                                                                                         | <input type="radio"/> | <input type="radio"/> | <input type="radio"/> |
| Through blog and/or wiki feeds of other individuals or groups                                                                                   | <input type="radio"/> | <input type="radio"/> | <input type="radio"/> |
| Other (please specify)                                                                                                                          |                       |                       |                       |

9. What are criteria you use in selecting an article to read?

|                                                             | <b>Very<br/>important</b> | <b>Somewhat<br/>important</b> | <b>Not<br/>important</b> |
|-------------------------------------------------------------|---------------------------|-------------------------------|--------------------------|
| Relevance of the article to the search topic                | <input type="radio"/>     | <input type="radio"/>         | <input type="radio"/>    |
| Quality/quantity of information provided<br>in the abstract | <input type="radio"/>     | <input type="radio"/>         | <input type="radio"/>    |
| Impact factor of the journal                                | <input type="radio"/>     | <input type="radio"/>         | <input type="radio"/>    |
| Reputation of the journal                                   | <input type="radio"/>     | <input type="radio"/>         | <input type="radio"/>    |
| Reputation of the author                                    | <input type="radio"/>     | <input type="radio"/>         | <input type="radio"/>    |
| Online availability of the article                          | <input type="radio"/>     | <input type="radio"/>         | <input type="radio"/>    |
| Subject discipline of the journal                           | <input type="radio"/>     | <input type="radio"/>         | <input type="radio"/>    |
| Other (please specify)                                      |                           |                               |                          |

10. What are the primary methods you use to identify the location/access point of the journal articles you wish to obtain? (check up to three)

- Clicking "Find it @ UIC" when in a database
  - Clicking on the publisher link (e.g., AMA, Elsevier, Springer, Wiley) when in a database
  - Do a search in a search engine (Google, Yahoo)
  - Searching the list of e-journals from the library's web page
  - Searching the library catalog to identify the library's print or online location
  - Through personal journal subscriptions
  - Using bookmarks in my Internet web browser and/or my own personalized home page (iGoogle, MyYahoo) to access preferred/commonly used journals
- Other (please specify)

11. If a journal article is not available online, but a copy can be accessed in another way, how likely are you to obtain the article by/through:

|                                                                                                              | <b>Very likely</b>    | <b>Somewhat likely</b> | <b>Not likely</b>     |
|--------------------------------------------------------------------------------------------------------------|-----------------------|------------------------|-----------------------|
| Requesting it through ILL (interlibrary loan)                                                                | <input type="radio"/> | <input type="radio"/>  | <input type="radio"/> |
| Going to the library, if article is newer (less than 5 years old) and available only in the library in print | <input type="radio"/> | <input type="radio"/>  | <input type="radio"/> |
| Going to the library if the article is older (5 years or older) and available only in the library in print   | <input type="radio"/> | <input type="radio"/>  | <input type="radio"/> |
| Going to the author's own web page                                                                           | <input type="radio"/> | <input type="radio"/>  | <input type="radio"/> |
| Sending a request to the author directly (e.g., email)                                                       | <input type="radio"/> | <input type="radio"/>  |                       |
| Online pay-per-view                                                                                          | <input type="radio"/> | <input type="radio"/>  | <input type="radio"/> |
| An open access repository (e.g., PubMed Central, institutional repositories)                                 | <input type="radio"/> | <input type="radio"/>  | <input type="radio"/> |

Sending a request to a colleague at another institution

Other (please specify)

---

12. How do you read journal articles? (check all primary methods that apply)

- Read a printout of an online copy of an article
  - Read a photocopy of an article from a print journal
  - Read the article directly in a print journal
  - Read the article online on a computer
  - Read the article on a handheld device (Blackberry, iPhone)
  - Download the article on a personal reader (Kindle, iPad) and read the article on the device
  - Other (please specify)
- 

13. In 1998, UIC had only 15 online journals; In 2000, UIC had 3,000 online journals; In 2008, UIC had more than 30,000 online journals. How has electronic access to information changed the way you search for or select articles? Please explain. (e.g., read more articles, use more articles in research, expand the variety of journals used, utilize technology to keep up to date: table of contents (TOC) alerts, use RSS feeds)?

---

14. What causes you the most problems in finding and accessing the literature?

---

### 3. Collaboration

In the following section, we would like to know more about how you collaborate with your colleagues and what tools you use.

15. What online tools do you use to share documents and/or references when collaborating with colleagues? *Select all that apply.*

- Email
  - EndNote Web
  - Zotero
  - RefWorks/RefShare
  - Mendeley
  - Other (please specify) or comment.
  - CiteULike
  - GoogleDocs
  - OfficeLive
  - Dropbox
  - YouSendIt
-

16. How do you primarily find other colleagues/researchers to collaborate on research? *Select all primary methods that apply.*

- Search publication databases (e.g., PubMed, Web of Science) to find other researchers in the field.
  - Search Google Scholar to find other researchers in the field.
  - Search the Internet (e.g., Google, Yahoo) to find other researchers in the field.
  - Search grant databases to find other researchers in the field.
  - Ask my colleagues for recommendations
  - Send out requests to email discussion lists?
  - At conferences/scholarly meetings
  - UICollaboratory/SciVal
  - BiomedExperts
  - ResearcherID
  - Linkedin.com
  - Facebook.com
  - Academia.edu
  - Usually rely on existing relationships with colleagues in my department/college.
  - Other (please specify) or comment.
- 

17. Have you ever used the UICollaboratory faculty profiles tool? (The UICollaboratory [provided by the CCTS] helps faculty members identify who is working in certain scientific areas at UIC. Because it displays a research profile which includes current research/publications, the tool exposes connections among researchers and can assist in identifying potential collaborators both internally and at other organizations.)

- Yes
- No
- I am aware of the tool, but have not used it
- I do not know what this is

#### 4. UICollaboratory

18. I have used the UICollaboratory tool:

- Only once
- 2 to 5 times
- 6 to 10 times
- 11 or more times

19. What have you used the UICollaboratory tool for? Please mark all that apply.

- Find a specific researcher's information
- Search a particular concept or topic area
- Search for grant information
- Find publications for a particular department or research team

- Utilize the Scival Experts Community function/find other institution information
  - Search for potential collaborators and it was successful
  - Search for potential collaborators but it was not successful
  - Other (please specify)
- 

20. How useful was the UICollaboratory in finding information and answering your questions?

- Very good (I am always able to access needed information)
- Good (I am often able to access needed information)
- Varies (I sometimes find the information I need)
- Poor (I frequently have difficulty with the tool)
- Very poor (I always have difficulty finding information using the tool)

21. To what degree do you think the UICollaboratory reflects accurate information regarding your own work (if you have seen your profile page)?

- Very accurate (All the appropriate information was included and accurate)
  - Good (Most of the information was included and accurate)
  - Varies (Some of the information was included and accurate)
  - Poor (Information was frequently missing or inaccurate)
  - Very poor (Information was always missing or inaccurate)
  - Other comments
- 

## 5. Information needs

22. For which of the topics below do you need more information? *Select all that apply.*

- Using library electronic resources (specify resources in "other" below)
  - Using bibliographic management software (e.g., RefWorks, EndNote)
  - Using the UICollaboratory
  - Finding the impact factor of a journal
  - Finding the number of times your publications are cited
  - Determining your h-index or other metrics to measure the impact of your work
  - Complying with the National Institutes of Health (NIH) public access policy
  - Complying with the National Science Foundation (NSF) data plan requirement
  - Collaborating with colleagues using online tools
  - Preserving and sharing research data
  - Retaining intellectual property rights to your research articles
  - Other (please specify)
- 

23. I would prefer to learn about the above types of information selected in question 22:

- On my own by exploring the database(s)/tool(s)
- On my own by reading articles and/or books
- In a hands-on or group instruction session arranged through my department

- Through a workshop offered by the library (or other appropriate department)
  - Through an online workshop offered by the library (or other appropriate department)
  - Through an online tutorial
  - Other (please specify)
- 

24. Please add any other comments on library resources/services that you would like us to know about. Are there services/resources you need that the library does not offer?

---

## 6. Brief questions about you

25. What college are you affiliated with at UIC?

- Applied Health Sciences
  - Dentistry
  - Medicine
  - Nursing
  - Pharmacy
  - Public Health
  - UIC Medical Center
  - Other (please specify)
- 

26. What campus are you affiliated with?

- Chicago
  - Peoria
  - Quad Cities
  - Rockford
  - Urbana
  - Other (please specify)
- 

27. What is your faculty rank or status?

Professor

- Associate professor
  - Assistant professor
  - Other (please specify)
- 

28. I am:

- Male
- Female



29. How many years have you been on the UIC faculty? (Include both fulltime, part-time, and temporary UIC appointments.)

- Less than 2
- 3 to 5 years
- 6 to 10 years
- 11 to 15 years
- 16 to 20 years
- 20 to 25 years
- 26 or more years
